# Supplementary material for: New model ensemble reveals how forcing uncertainty and model structure alter climate simulated across CMIP generations of the Community Earth System Model
Source: Copernicus journal article supplement (doi:10.5194/gmd-2023-125), 2023-08-04
Supplement: Supplementary file 1 [file gmd-2023-125-supplement.pdf]

Supplemental Figure.

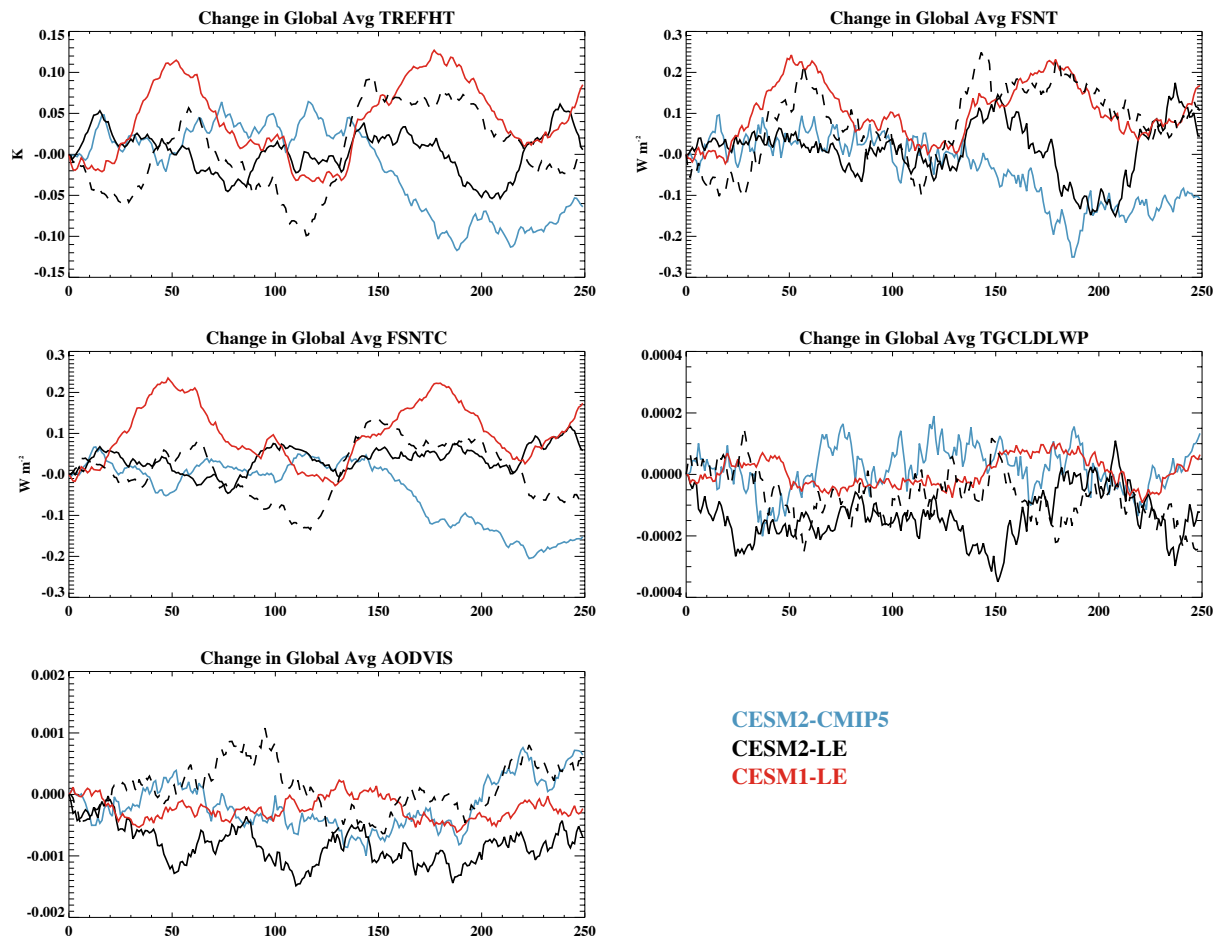

Figure. The timeseries of anomalies of global mean properties from the pre-industrial control integration starting from the time at which historical runs were initialized in the year 1850 for the CESM2-CMIP5 runs (blue), CESM2-LE (black) and CESM1-LE (red). For the CESM2-LE simulations, two lines (solid and dashed) are shown because historical runs were initialized at different periods from the pre-industrial control with the macro-initialization method. Values shown are for global mean anomalies of (a) surface air temperature, (b) net shortwave radiation at the top of the atmosphere, (c) net clear-sky shortwave radiation at the top of the atmosphere, (d) cloud liquid water path, and (e) aerosol optical depth.
