# Supplementary material for: New model ensemble reveals how forcing uncertainty and model structure alter climate simulated across CMIP generations of the Community Earth System Model
Source: Copernicus journal article supplement (doi:10.5194/gmd-2023-125), 2023-08-04
Supplement: Supplementary file [file gmd-2023-125-RC1-supplement.pdf]

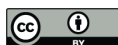

## New model ensemble reveals how forcing uncertainty and model structure alter climate simulated across CMIP generations of the Community Earth System Model

Marika M. Holland<sup>1</sup>, Cecile Hannay<sup>1</sup>, John Fasullo<sup>1</sup>, Alexandra Jahn<sup>2</sup>, Jennifer E. Kay<sup>3</sup>, Michael Mills<sup>4</sup>,  
Isla R. Simpson<sup>1</sup>, William Wieder<sup>1</sup>, Peter Lawrence<sup>1</sup>, Erik Kluzek<sup>1</sup>, David Bailey<sup>1</sup>

5

<sup>1</sup>Climate and Global Dynamics Laboratory, National Center for Atmospheric Research, Boulder, CO USA

<sup>2</sup>Department of Atmospheric and Oceanic Sciences and Institute of Arctic and Alpine Research, University of Colorado, Boulder, CO USA

<sup>3</sup>Department of Atmospheric and Oceanic Sciences and Cooperative Institute for Research in Environmental Science, University of Colorado, Boulder, CO USA

<sup>4</sup>Atmospheric Chemistry Observations and Modeling Laboratory, National Center for Atmospheric Research, Boulder, CO USA

*Correspondence to:* Marika M. Holland (mholland@ucar.edu)

### 15 **Abstract.**

Climate simulation uncertainties arise from internal variability, model structure, and external forcings. Model intercomparisons (such as the Coupled Model Intercomparison Project; CMIP) and single-model large ensembles have provided insight on uncertainty sources. Under the Community Earth System Model (CESM) project, large ensembles have been performed for CESM2 (a CMIP6-era model) and CESM1 (a CMIP5-era model). We refer to these as CESM2-LE and CESM1-LE. The external forcing used in these simulations changed to be consistent with their CMIP generation. As a result, differences between CESM2-LE and CESM1-LE ensemble means arise from changes in both model structure and forcing. Here we present new ensemble simulations which allow us to separate the influences of these model structural and forcing differences. Our new CESM2 simulations are run with CMIP5 forcings equivalent to those used in the CESM1-LE. We find a strong influence of historical forcing uncertainty due to aerosol effects on simulated climate. For the historical period, forcing drives reduced global warming and ocean heat uptake in CESM2-LE relative to CESM1-LE that is counteracted by the influence of model structure. The influence of model structure and forcing vary across the globe and the Arctic exhibits a distinct signal that contrasts with the global mean. For the 21<sup>st</sup> century, the importance of scenario forcing differences (SSP3-7.0 for CESM2-LE and RCP8.5 for CESM1-LE) is evident. The new simulations presented here allow us to diagnose the influence of model structure on 21<sup>st</sup> century change despite large scenario forcing differences, revealing that differences in the meridional distribution of warming are caused by model structure. Feedback analysis reveals that clouds and their impact on shortwave radiation explain many of these structural differences between CESM2 and CESM1. In the Arctic, albedo changes control transient climate evolution differences due to structural differences between CESM2 and CESM1.

### 1 **Introduction**

Model intercomparison projects such as the Coupled Model Intercomparison Project (CMIP; Eyring et al., 2016) have enabled considerable advances in our understanding of the climate system. Central to CMIP is the adoption of the same external forcing by multiple modeling centers. For historical and future simulations, this includes both natural (volcanic and solar) and anthropogenic (greenhouse gas, ozone, sulfate aerosol, and carbon aerosol) forcings. The availability of coordinated

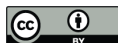

simulations from different centers run with the same external forcing allows for the quantification of model structural uncertainty, the inter-model contrast that arises from differences in resolution, physical parameterizations, and other specified  
40 or emergent model attributes. The advantage of using the same external forcing in model experiments is also relevant for coordinated projects outside of CMIP. For example, comparing the recent publicly available single model large ensembles (Deser et al, 2020) enables the separation of model structure and internal variability uncertainty. This separation cannot be accurately done from CMIP simulations alone because of typically small ensemble sizes from individual models. Single model large ensembles of historical conditions also enable comparison to the observed record within the context of internal variability.  
45 While the broad use of common external forcing is important, inherent in the assessment of climate simulation fidelity with observations is that the applied historical external forcings are credible.

While CMIP has enabled consistent historical external forcing to be applied across independently developed models, the influence of forcing uncertainty on historical climate simulations can be considerable, especially for aerosols (e.g., Wang et al., 2021). For example, recent work using the Community Earth System Model 2 (CESM2) has shown that uncertainties in biomass burning emissions affect historical warming (Fasullo et al., 2022), Arctic sea ice loss (DeRepentigny et al., 2022) and the hydrologic cycle (Heyblom et al., 2022). These studies found that interannual variability of prescribed biomass burning emissions affect climate through nonlinear cloud-aerosol interactions. The interannual variability of biomass burning is not well known prior to satellite estimates beginning in 1997. Because of this, prescribed biomass burning emissions either have  
55 a discontinuity in variability in 1997, as done for CMIP6, or omit the post-1997 observed interannual variability, as done for CMIP5. Uncertainties in other prescribed aerosol forcings also affect historical simulations. For example, Fyfe et al. (2021) showed that differences in volcanic aerosol and anthropogenic aerosol forcing between CMIP5 and CMIP6 influence the surface air temperature evolution in Canadian Earth System Model (CanESM5) simulations. These studies highlight that forcing uncertainty can complicate the attribution of differences between models and observations.

60 Forcing uncertainty for both historical conditions and future projections (often called “scenario uncertainty”; Hawkins and Sutton, 2009) can also cause challenges when comparing across climate model generations. Ideally, the availability of large initial condition ensemble simulations with different generations of the same model would allow us to quantify the influence of new model developments on the simulated transient climate evolution and climate variability. Comparing multiple models  
65 across various phases of CMIP would also ideally allow for assessment of how models as a group are performing relative to observations. However, model forcing protocols change with the phases of CMIP. This forcing change is well recognized for future model projections. For example, in the transition from Representative Concentration Pathway scenarios (RCPs; Van Vuuren et al., 2011) used in CMIP5 to the Shared Socioeconomic Pathways scenarios (SSPs; Meinshausen et al., 2020) used in CMIP6. Perhaps less well understood is that historical forcings are also revised between CMIP phases, and that these changes  
70 to the historical forcing impact simulated historical climate.



Here, we present simulations which enable quantification of the influence of external forcing uncertainty and model structural uncertainty on transient climate within a single modeling system: the Community Earth System Model (CESM). This work builds on large initial condition ensemble simulations that have been performed for CESM1 using CMIP5 forcing protocols (CESM1-LE; Kay et al., 2015) and CESM2 using CMIP6 forcing protocols (CESM2-LE; Rodgers et al., 2021). These simulations have been very well utilized by the research community to investigate many aspects of the climate system. Work by this broad research community includes comparisons between the CESM1-LE and CESM2-LE to understand differences between them. However, the differences between these two ensembles arise from both model structural changes (i.e., CESM1 to CESM2) and external forcing changes (i.e., CMIP5 to CMIP6), prohibiting the attribution of simulation differences to model structure alone. Thus, to enable the separation of model structure and forcing influences, we have performed a new set of CESM2 simulations with external forcings that are CMIP5-based and equivalent to those used in the CESM1-LE simulations. We provide information on the experimental design of these new simulations, including the model version, external forcing, and tuning. Through comparison with CESM1-LE and CESM2-LE, these **new CESM2-CMIP5 simulations** enable us to separate forcing uncertainty and model uncertainty within the context of the CESM large ensembles, all while accounting for internal climate variability. Here, we present these new experiments and use them to disentangle the influence of model structure and external forcing on global and regional climate warming. The overarching goal is that these **available** community experiments will allow researchers to further investigate the influence of CESM model structure and CMIP forcing uncertainty on numerous aspects of simulated earth system variability and change. Given the computational expense required to perform these simulations, they serve as a valuable community resource.

## 90 **2 Experimental Design**

Both CESM1 (Hurrell et al., 2013) and CESM2 (Danabasoglu et al., 2020) are comprehensive global climate models that include atmosphere, ocean, land, and sea ice components. Both models are run at a nominal 1° horizontal resolution. There were changes across all component models in the transition from CESM1 to CESM2. Some notable changes in the atmosphere include updated cloud microphysics (MG2; Gettelman and Morrison, 2015), the inclusion of an additional aerosol mode in the Modal Aerosol Model (MAM4; Lui et al., 2016), and the inclusion of the Cloud Layers Unified By Binormals (CLUBB) unified turbulence scheme (Golaz et al., 2002; Larson, 2017). In the ocean model, CESM2 includes a new Langmuir mixing parameterization (Li et al., 2016) and the mixing effects of estuaries (Sun et al., 2019). Prognostic salinity (Turner and Hunke, 2015) and an updated melt pond scheme (Hunke et al., 2013) are included within the CESM2 sea ice component. Within the land model, numerous new processes and parameterizations are included within CESM2 that have improved the realism of hydrological and ecological processes (Lawrence et al., 2019). Many studies have compared the CESM1 and CESM2 versions to document differences in simulated climate variability and transient climate evolution (e.g., CESM2 special collection [https://agupubs.onlinelibrary.wiley.com/doi/toc/10.1002/\(ISSN\)1942-2466.CESM2](https://agupubs.onlinelibrary.wiley.com/doi/toc/10.1002/(ISSN)1942-2466.CESM2)). CESM2 has a considerably higher



equilibrium climate sensitivity than CESM1 (Gettelman et al., 2019; Bacmeister et al., 2020), although the transient climate response is similar in the two models (Danabasoglu et al., 2020).

105

To enable the study of climate change and internal climate variability, large ensembles have been performed with both CESM versions. For the CESM1-LE (Kay et al., 2015), the simulations used forcing protocols from CMIP5 (e.g. Lamarque et al., 2010; Meinshausen et al., 2011) with the exception of ozone concentrations which were obtained from a CESM1 simulation using the Whole Atmosphere Community Climate Model (WACCM) with active chemistry (Marsh et al., 2013). RCP8.5 scenario forcing is used for 2006-2100. Here we refer to the forcing used in the CESM1-LE simulations as CMIP5 forcing, although we recognize that other RCP scenarios are available under the CMIP5 forcing protocol. CESM1-LE simulations included a multi-century preindustrial control, a single member run from 1850-1920 and 40 members from 1920-2100. The 40 members were initialized with the same conditions in 1920 but with a micro-perturbation equivalent to a random round-off level (order of  $10^{-13}$ K) perturbation applied to the air temperature field. For many climate properties, initial-condition memory can persist for several years to a decade and so the initial 1920 decade of simulated conditions are not independent. Note that for some properties, like Southern Ocean surface climate, the initial condition influence can persist longer (Singh et al., 2023).

110

115

In the first 50 members of the CESM2-LE (Rodgers et al., 2021) forcing data provided by CMIP6 (Eyring et al., 2016) were used apart from stratospheric ozone, stratospheric aerosols, H<sub>2</sub>O production rates due to methane oxidation in the stratosphere, and nitrogen deposition to the land and ocean components. These non-CMIP6 provided forcings were obtained from CESM2(WACCM6) simulations with active chemistry (Gettelman et al., 2019b), which applied CMIP6-provided forcings but calculated the chemical and aerosol constituents. The CESM2-LE simulations cover 1850-2100 and use scenario forcing from SSP3-7.0 for 2015-2100. We refer to this as CMIP6 forcing, although we acknowledge that it is just one of the scenarios used for CMIP6 and is not necessarily representative of the other SSPs. Indeed, relative to other SSP scenarios, SSP3-7.0 maintains high sulfur and black carbon emissions throughout the 21<sup>st</sup> century (Gidden et al., 2019). The CESM2-LE ensemble members are initialized with a mix of micro-perturbations similar to the CESM1-LE and macro-perturbations in which initialization is taken from different years of a CESM2 multi-century preindustrial control simulation. As documented by Fasullo et al. (2022) and DeRepentigny et al. (2022), the CMIP6 biomass burning emissions exhibit a large increase in variability during 1997-2014 with the incorporation of satellite-based emission data. This influences the simulated early 21<sup>st</sup> century transient climate, particularly in the northern hemisphere extratropics. Given this, in the second 50 members of the CESM2-LE (referred to here as CESM2-LEsmbb) the prescribed biomass burning emissions were smoothed. This largely affects conditions from 1990-2020. These CESM2-LEsmbb simulations are used to provide an estimate of the influence of the changing biomass burning emission variability on simulated change.

120

125

130

135

Large ensemble simulations (and the simulations performed here) require extensive computational resources, limiting the ability to perform simulations with multiple forcing scenarios. The scenario forcing used in the two CESM large ensembles

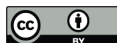

are different both in their details and in the approximate level of radiative forcing reached in 2100 (8.5 W/m<sup>2</sup> for RCP8.5 used in CESM1-LE and 7.0 W/m<sup>2</sup> for SSP3-7.0 used in CESM2-LE). The new simulations performed for this study enable us to explicitly assess the role of model structure in differences between the simulated 21<sup>st</sup> century change in CESM1-LE and CESM2-LE despite the significant scenario forcing differences. Importantly, the forcing used in the historical simulations also differs considerable from CMIP5 to CMIP6 with implications for historical change simulated in these large ensembles.

To enable separation of the role of forcing versus model structure in the differences between CESM1-LE and CESM2-LE, we have performed an additional set of simulations in which CESM2 uses forcing from CMIP5 consistent with that used in CESM1-LE. We refer to this new set of simulations as CESM2-CMIP5. Changing the forcing in CESM2 led to a slight radiative imbalance at the top of the model in the pre-industrial control, likely due to different background volcanic aerosol emissions. This model imbalance can result in a long spin-up adjustment. For example, as shown in Fyfe et al. (2021), in similar pre-industrial control experiments performed with the CanESM5 model, the inclusion of background aerosol emissions results in a multi-century cooling drift in global mean surface temperature. To avoid a long spin-up adjustment, it is desirable to achieve a low model imbalance in control simulations and the CESM project uses a criterion of <0.1 W m<sup>-2</sup> for the top of model imbalance (Danabasoglu et al., 2020). Given this, to achieve radiative balance and prevent temperature drifts over time in the pre-industrial control simulation, we applied a small adjustment to a tuning parameter (clubb\_gamma\_coef=0.318 in the CESM2-CMIP5 runs versus clubb\_gamma\_coef=0.308 in the CESM2-LE runs). This parameter controls the PDF of subgrid vertical velocity within the CLUBB scheme and decreasing clubb\_gamma\_coef increases the stratiform nature of the clouds, which brightens them. Since the tuning applied is small, we expect the influence on the simulated transient climate response to be small relative to the CMIP5 versus CMIP6 forcing differences. The same parameter value of clubb\_gamma\_coef was used in the pre-industrial, historical and RCP8.5 runs for the CESM2-CMIP5 simulations.

This CESM2-CMIP5 set of simulations includes a 500-year preindustrial control that is initialized at year 501 of the CESM2-LE preindustrial control and has static 1850 forcing, a single member from 1850-1920 that is initialized from year 250 of the preindustrial control, and fifteen total members from 1920-2100. Model simulation drift in the preindustrial control run for simulation properties assessed here is small at the time of historical run initialization (Supplemental Material) and does not qualitatively affect our results. Similar to the CESM1-LE, we use a micro-perturbation method to initialize the ensemble simulations in 1920. For the historical period prior to 2006, CMIP5 historical forcings were used and then in the 2006-2100 period, the RCP8.5 scenario forcing was used, as in CESM1-LE. All the experimental design information for these simulations can be found on the github repository (<https://github.com/NCAR/CESM2-CMIP5>). In CESM2, aerosols are treated using a four-mode version of the Modal Aerosol Model (MAM4; Liu et al., 2016). Relative to the three-mode version (MAM3) used in CESM1, MAM4 includes an additional primary carbon mode. As such, the amount of particulate organic matter (POM) and black carbon (BC) emissions used in the CESM2-CMIP5 simulations was the same as that in CESM1-LE but they were put in the primary carbon mode available in MAM4. This additional primary carbon mode allows for an explicit treatment of the



aging of primary carbonaceous aerosols. While the aerosols are in this mode, they are hydrophobic and are not removed by wet deposition, leading to an overall lengthening of the lifetime of carbonaceous aerosols within MAM4 and a substantial increase in particulate organic matter and black carbon burdens in some regions (Liu et al., 2016).

175 The time evolution of global anthropogenic and biomass burning emissions used in the simulations is shown in Figure 1. The time resolution of specified emissions data varies between the CMIP5-based forcing, which used a linear interpolation of decadal means, and CMIP6-based forcing, which used annual values for the historical period and a linear interpolation of decadal means for the scenario forcing. Additionally, the emission magnitudes differ between CMIP5 and CMIP6. This emission difference is expected for much of the 21<sup>st</sup> century as the RCP8.5 scenario used in the CESM1-LE runs differs from  
180 the SSP3-7.0 scenario used in CESM2-LE. However, the emissions also differ, sometimes substantially, for the historical period.

Volcanic forcing also differs throughout the simulations (Figure 2). In CMIP5, there are no background stratospheric aerosols prescribed in the simulations. In contrast, a background averaged volcanic forcing was applied in the preindustrial control,  
185 historical, and SSP scenario integrations for CMIP6. Fyfe et al. (2021) found that this difference in background volcanic forcing influenced the control climate state with consequences for 20<sup>th</sup> century warming. The aerosols associated with specific eruptions throughout the historical period also differ from CMIP5 to CMIP6. Unfortunately, the volcanic aerosol burden is not available from both model simulations. However, a comparison of the volcanic aerosol burden in CESM1-LE with the stratospheric aerosol optical depth in CESM2-LE indicates that CMIP6 generally includes more eruptions and that the  
190 eruptions have different relative forcing (Figure 2). In contrast to the prescribed aerosols, the prescribed concentrations of greenhouse gases (Figure 3) are nearly identical for the historical period and the early-21<sup>st</sup> century but start to diverge around 2040 given the different RCP8.5 and SSP3-7.0 scenarios used for the CMIP5-based versus CMIP6-based simulations.

### 3 Methods

We present global and regional climate metrics to determine factors driving differences between CESM1-LE and CESM2-LE  
195 20<sup>th</sup> and 21<sup>st</sup> century warming. We focus on the forced climate response, and so assess ensemble mean properties. We attribute differences between CESM1-LE and CESM2-LE to the influence of differences in model structure and differences in model forcing using the following:

$$\text{Model structure influence} = \text{CESM2-CMIP5} - \text{CESM1-LE} \quad (1)$$

200

$$\text{Forcing influence} = \text{CESM2-LE} - \text{CESM2-CMIP5} \quad (2)$$



As identified in previous studies (Fasullo et al., 2022; DeRepentigny et al., 2022; van Marle et al., 2017), the CMIP6 forcing used in CESM2-LE applies biomass burning emissions at the end of the historical period based on satellite data. This leads to an increase in the high frequency variability of biomass burning emissions from 1997-2015 relative to earlier and later periods.

As discussed above, we also use the CESM2-LE simulations to quantify the response to highly variable biomass burning in the CMIP6 forcing using:

$$\text{Variable Biomass Burning (BB) Forcing influence} = \text{CESM2-LE} - \text{CESM2-LEsmbb} \quad (3)$$

210

If this term is near zero, then the changing variability in biomass burning that is present in the standard CMIP6 forcing has little influence relative to smoothed biomass burning emissions. Notably, other changes are present in the biomass burning emissions between CMIP6 and CMIP5 and so the analysis of biomass burning forcing influence quantified here only reflects the influence of emission variability within CMIP6.

215

All anomalies discussed below are relative to the 1920-1950 period when both CESM2 and CESM1 have large ensemble simulations available. Given the large number of ensemble members in the CESM1-LE, CESM2-LE and CESM2-LEsmbb, the ensemble mean quite robustly characterizes the forced climate response for these cases. However, because of computational constraints, only 15 members are available for the CESM2-CMIP5 simulations. To quantify the effect of this smaller sample size on our results, we apply bootstrapping in the computation of the model and forcing influence metrics. We resample, with replacement, the members from the CESM1-LE and CESM2-LE to produce bootstrapped ensembles with the same ensemble size as the CESM2-CMIP5 and calculate the “Model influence” and “Forcing influence” as per equations 1 and 2. We repeat this 1000 times and present information showing the 2.5<sup>th</sup>-97.5<sup>th</sup> percentile of bootstrapped estimates. Because the biomass burning forcing uncertainty (equation 3) is based on a difference in ensemble means for CESM2-LE and CESM2-LEsmbb, which both have 50 members, no bootstrapping is performed.

225

## 4 Results

### 4.1 Global Change

Over the historical period for the 2000-2020 average, the globe warms modestly more in CESM2-LE (0.84°C, with a standard deviation of 0.08°C across members) than in CESM1-LE (0.73°C, with a standard deviation of 0.06°C across members) (Figure 4a), although the ensembles overlap. Model structural changes consistently result in more surface warming in CESM2-LE than in CESM1-LE over the 20<sup>th</sup> and 21<sup>st</sup> centuries (Figure 4b). This warming difference is counteracted by differences in the external forcing, except from 2000-2010 when the total forcing influence is neutral. Uncertainty associated with biomass burning emission variability results in less warming for the 2000-2010 period and may explain some of the total forcing influence. Taken together, the compensation between model structure and forcing leads to the relatively similar 20<sup>th</sup> century

230



235 warming in CESM1-LE and CESM2-LE. Later in the 21<sup>st</sup> century, the forcing differences associated with the different scenarios dominates and leads to less global warming in CESM2-LE than in CESM1-LE by 2100.

Simulation differences in the global temperature change evolution (Figure 4) strongly correspond to changes in the global net top of atmosphere (TOA) shortwave (SW) flux (Figure 5a). The sign convention is such that the net SW flux is positive. Thus, increasing SW values are associated with a lower planetary albedo and more shortwave radiation retained in the earth system. Over the 20<sup>th</sup> century, all simulations show a decline in net SW, indicating a higher global planetary albedo. This largely results from emissions of anthropogenic sulfate aerosols. Consistent with previous work (Trenberth and Fasullo, 2009), the net SW changes then reverse sign, increasing in the early 21<sup>st</sup> century and leading to more SW warming of the globe. As compared to CESM1-LE, CESM2-LE has smaller net SW reductions in the 20<sup>th</sup> century but reaches a similar net SW increase by 2100. The time-varying differences between CESM2-LE and CESM1-LE are due to a relative compensation of the influence of model structure and forcing that changes over time. Model structure consistently drives a relative increase in net SW anomalies in CESM2 compared to CESM1 throughout the 20<sup>th</sup> and 21<sup>st</sup> centuries (Figure 5b). However, the CMIP6 forcing counteracts this structural difference, except for 2000-2020 when the forcing has little impact. In the later part of the 21<sup>st</sup> century, this forcing influence is particularly large consistent with the different scenario forcing and by 2100, the influence of external forcing and model structure nearly balance. In the end, the 2100 net SW change is similar in CESM2-LE and CESM1-LE.

Changes in the net SW flux can be associated with both clear and cloudy sky conditions. An analysis of the cloud liquid water path (LWP) suggests that much of the simulated differences in the global average net SW flux between CESM2-LE and CESM1-LE are associated with clouds. The global average LWP increases in the 20<sup>th</sup> century and then generally stays elevated through 2100 relative to the 1920-1950 average (Figure 5c). The influence of model structure and forcing on changing LWP (Figure 5d) bears a striking resemblance to the analysis of the net SW flux (Figure 5b) (although with opposite sign, consistent with the influence of LWP on cloud albedo). Model structure causes smaller 20<sup>th</sup> century global LWP increases in CESM2 relative to CESM1 with these differences then being retained through the 21<sup>st</sup> century. In contrast, the CMIP6 model forcing contributes to larger increases in LWP throughout the 20<sup>th</sup> and 21<sup>st</sup> centuries.

An analysis of the clear sky net SW flux (Figure 5e) suggests that in the 20<sup>th</sup> century model structure has limited influence on differences between CESM2-LE and CESM1-LE. 20<sup>th</sup> century forcing differences also have a modest influence, although differences in episodic volcanic forcing are evident (Figure 5f) with implications for episodic reductions in air temperature. In the 21<sup>st</sup> century, both model structure and external forcing reduce the clear sky net SW flux in CESM2-LE relative to CESM1-LE. This reduction is consistent with changes in aerosol optical depth (Figure 5g and 5h) that result from higher sustained aerosol emissions (Figure 1) and model structural changes. It is also affected by a cryospheric albedo contribution as discussed further below.





270 The changing planetary heat budget is consistent with the changing global ocean heat content as indicated by global depth-  
integrated ocean temperature (Figure 6). Model structure leads to more ocean heat uptake in CESM2 relative to CESM1  
throughout the 20<sup>th</sup>-21<sup>st</sup> centuries. This heat uptake difference is counteracted by the forcing differences, with the historical  
CMIP6 and SSP3-7.0 scenario resulting in less heat uptake. As a result, the change in ocean heat content by 2100 is quite  
similar between the CESM2-LE and CESM1-LE, which is consistent with the surface air temperature and SW budget analysis  
above.

275

#### 4.2 Zonal Average Change

The impact of changes in cloud properties and aerosol optical depth can vary by location. Additionally, the global average  
metrics can mask compensating regional changes. For example, while model structure causes more 20<sup>th</sup>-21<sup>st</sup> century global  
warming in CESM2 relative to CESM1 (Figure 4), the influence of model structure on climate varies considerably by latitude  
280 (Figure 7). In particular, throughout the 21<sup>st</sup> century, model structural differences result in more CESM2 warming in the tropics  
but less in the high northern latitudes (Figure 7c,d,e). From 1980-2010, the CMIP6 forcing enhances Arctic warming (Figure  
7f). This may be related in part to biomass burning variability as revealed by comparison of CESM2-LE and CESM2-LEsmbb  
(Figure 7c; Fasullo et al. 2022, DeRepentigny et al. 2022) although this is only a fraction of the total CMIP6 versus CMIP5  
effect (Figure 7c). Through the remainder of the 21<sup>st</sup> century, from 2020-2100, forcing reduces warming at all latitudes in  
285 CESM2-LE, with the largest influence in the Arctic. This is consistent with the lower greenhouse gas concentrations and higher  
aerosol emissions in SSP3-7.0 as compared to RCP8.5. However, in spite of the lower approximate radiative forcing  
represented by the SSP3-7.0 scenario, a similar tropical warming is present by 2100 in CESM2-LE and CESM1-LE due to the  
compensating effect of model structural differences.

290 Previous work indicates that shortwave cloud forcing and feedbacks differ between CESM2 and CESM1 (Danabasoglu et al.  
2020; Gettelman et al. 2019; Bacmeister et al; 2020; Schneider et al. 2022) and have a distinct meridional structure. Given  
this, we assess the latitudinal structure of the change in net top of atmosphere shortwave fluxes and the influence of model  
structure and forcing differences in driving changes over the 21<sup>st</sup> century (Figure 8). These are generally consistent with the  
surface air temperature change analysis (Figure 7), suggesting a causal link in which regional SW changes drive regional  
295 changes in air temperature. By 2100, the net shortwave increases at nearly all latitudes in all simulations (Figure 8b), indicating  
more shortwave heating and a lower planetary albedo. This decreased planetary albedo is consistent with a decrease in total  
cloud cover everywhere, except the high latitudes (not shown), where a cryospheric response to warming plays a role, as  
discussed further below. The influence of structural model differences has a quite consistent spatial pattern through the 21<sup>st</sup>  
century, resulting in a generally larger SW increase in the tropics in CESM2 but a smaller Arctic change (Figure 8e). The  
300 importance of external forcing changes over time. In the early 21<sup>st</sup> century, the forcing counteracts the structural model  
differences at most latitudes (Figure 8c). However, by 2100, the CMIP6 forcing drives lower net SW increases nearly



everywhere (Figure 8d) which is consistent with the higher aerosol emissions and lower greenhouse gases in the SSP3-7.0 as compared to the RCP8.5. Notably, even with the considerably different scenario forcing by 2100, on a regional basis, the forcing influence is small relative to the influence of model structure. As such, the model structural influence largely explains  
305 the different patterns of zonal SW heating in 2100.

The net SW changes result from changing aerosols, cloud cover, cloud properties, and surface albedo. We assess these factors using an approximate partial radiative perturbation (APRP) method (Taylor et al., 2007) that enables us to separate the SW cloud feedback and the surface albedo feedback. An assessment of the SW cloud feedback (Figure 9) suggests that over the  
310 21st century, clouds explain much of the SW signal shown in Figure 8 although there are some discrepancies in high latitudes. In all simulations by 2100, clouds drive less SW reflection (and so a positive feedback) for much of the 50S-50N region (Figure 9b). In high latitudes, the models simulate a negative feedback indicating that clouds drive more SW reflection for the 2080-2100 period, although the models differ in the magnitude and exact location of this response in the Arctic. The influence of model structure and external forcing on differences in the SW cloud feedback between CESM2-LE and CESM1-LE (Figure  
315 9c and 9d) bears a strong resemblance to the net SW analysis (Figure 8c and 8d) for most of the globe. For both the early and late 21<sup>st</sup> century changes, model structure causes a more positive SW cloud feedback in CESM2 over most of the tropics. This indicates a decreased tropical cloud brightening in CESM2 relative to CESM1, consistent with the model structural influence on net SW (Figure 8). However in high latitudes, it is less clear that cloud feedbacks are responsible for differences in the net SW between the CESM2-LE and CESM1-LE. For example, in the Arctic, model structure leads to a large reduction in net SW  
320 in CESM2 for both the early and late 21<sup>st</sup> century (Figure 8c and 8d) that appears much smaller than the cloud feedback influence (Figure 9c and 9d). Analysis of the surface albedo feedback (Figure 10) helps to explain this discrepancy. In particular, model structure results in a much weaker albedo feedback in CESM2 relative to CESM1 for both the early and late 21<sup>st</sup> century.

### 4.3 Arctic Change

325 The zonal average comparison points to large changes in the Arctic between CESM2-LE and CESM1-LE in which the attribution to model structure, external forcing, and the relative compensation of the **two changes** over time. Additionally, the net SW analysis implicates Arctic cryospheric changes. As such, we assess differences in Arctic amplification and sea ice across the simulations.

330 The Arctic amplification (AA) factor, defined as the surface air temperature change for 70-90N divided by the **global air temperature change**, is shown in Figure 11. Results are shown for 10-year running average changes. As discussed by Holland and Landrum (2021), AA typically emerges from background climate noise around 2000 (see also England et al., 2021) and model simulations often exhibit transient changes in AA over the 21<sup>st</sup> century. At the beginning of the 21<sup>st</sup> century, CESM2-LE simulates higher AA than CESM1-LE, consistent with the larger CMIP6-driven Arctic warming (Figure 7). The AA in



335 CESM2-LE declines rapidly in the 21<sup>st</sup> century reaching values lower than that of CESM1-LE after 2020. Throughout the 21<sup>st</sup>  
century, model structure drives this reduced AA in CESM2 relative to CESM1, consistent with its influence on Arctic warming.  
Starting in the mid-21<sup>st</sup> century, forcing differences play little role in the AA differences in the CESM2-LE and CESM1-LE  
simulations. This indicates that while the forcing is quite different during this period, with effects on the absolute warming, it  
has limited influence on the amplification of global warming in the Arctic.

340

In September, CESM2-LE has lower ice area throughout the 20<sup>th</sup> century relative to CESM1-LE (Figure 12a) (see also  
DeRepentigny et al., 2020; DuVivier et al., 2020). This sea ice difference between the two models is a consequence of model  
structure (Figure 12b). All the simulations reach near ice free conditions by mid-21<sup>st</sup> century. There is a larger loss of ice area  
in CESM1-LE than in CESM2-LE, which contributes to the larger surface albedo feedback in that model (Figure 10, see also  
345 Schneider et al. 2022 Figure 3). Surface characteristics of the sea ice also likely influence model differences in the early 21<sup>st</sup>  
century albedo feedback. For example, the higher CESM1-LE feedback is consistent with thicker and more extensive snow  
cover on the sea ice (Webster et al., 2020) and a higher initial surface albedo. The influence of forcing uncertainty on September  
sea ice area is relatively small except for the 2000-2020 period when CMIP6 forcing leads to more rapid sea ice loss. A  
comparison to the CESM2-LEsmmb simulations indicates that changing variability in biomass burning emissions, highlighted  
350 as an important driver of September ice loss in DeRepentigny et al (2022), is about half the magnitude of the total influence  
of the CMIP6 versus CMIP5 forcing difference.

As compared to CESM1-LE, CESM2-LE has a lower March Arctic sea ice cover through the mid-21<sup>st</sup> century (Figure 12c).  
Both model structure and external forcing contribute to the lower 20<sup>th</sup> century sea ice, with model structure playing a larger  
355 role (Figure 12d). Starting around mid-21<sup>st</sup> century, CMIP6 forcing leads to reduced loss of March sea ice area as compared  
to the CMIP5 forcing, consistent with the SSP3-7.0 forcing relative to RCP8.5. However, after 2070, model structure enhances  
the CESM2 March sea ice area loss. As a result, CESM2-LE and CESM1-LE obtain similar March sea ice area in 2100, despite  
a weaker winter sea ice area loss in CESM2-LE prior to 2070.

## 5 Conclusions

360 There are multiple sources of uncertainty in climate model simulations including internal variability, model structural  
uncertainty, and external forcing uncertainty, which is typically called scenario uncertainty for future projections (e.g.,  
Hawkins and Sutton, 2009). Large initial condition ensemble simulations enable the separation of internal variability from  
forced changes in climate properties and allow for a more robust comparison to observations. Ideally, comparisons of large  
ensembles across model generations or phases of CMIP could provide insight on model improvements over time. However, in  
365 addition to structural model changes, the external forcing used in progressive phases of CMIP changes for both historical  
aerosol emissions and the future scenario forcing of aerosols and greenhouse gases. Here we present new CESM community



simulations that, together with the existing large ensembles of CESM1 (a CMIP5-era model) and CESM2 (a CMIP6-era model), enable us to quantify the relative importance of model structure versus forcing uncertainty within the context of the CESM large ensembles. This is useful for both the historical period when uncertainties in aerosol emissions and other forcings play a role and for the 21<sup>st</sup> century where considerably different scenarios applied in CESM1-LE and CESM2-LE limit the ability to attribute differences in their 21<sup>st</sup> century climate response to model structural differences. These new CESM2-CMIP5 simulations use the CESM2 model but subject to the CMIP5 forcing used in CESM1-LE. They are available for community use, which will enable further exploration of the relative importance of model structure and forcing uncertainty on simulated climate characteristics.

375

For the historical period, we find that the forcing uncertainty inherent in the CMIP5 to CMIP6 differences can be as sizable as the CESM1 to CESM2 model physics differences. On the global mean, the CMIP6 forcing drives a reduced ocean heat uptake and global surface air temperature change relative to the CMIP5 forcing. Model structural changes between CESM2 and CESM1 counteract this and drive larger global average warming in CESM2. This is largely a consequence of differences in changing cloud conditions and their role in shortwave radiation budgets. Because of the compensating effects of forcing and model structure, the CESM2-LE and CESM1-LE simulate a similar historical global warming.

380

The influences of model and forcing uncertainty in the CESM2-LE to CESM1-LE differences are not uniform across the globe. For the 2000-2020 average, the Arctic region exhibits a distinct signal that contrasts with the global mean, with CMIP6 forcing driving increased historical warming that is counteracted by the CESM2 model structure. Some fraction of this Arctic response may be due to the influence of changing variability in biomass burning emissions that is present in CMIP6 but not in CMIP5 (Fasullo et al, 2022; DeRepentigny et al, 2022). However, biomass burning variability typically accounts for less than half of the difference that is attributable to the CMIP6 versus CMIP5 forcing. Feedback analysis suggests that the historical differences in regional warming and their attribution to model and forcing uncertainty largely arise from the influence of changing cloud properties on global shortwave budgets, with surface albedo changes also playing a role in high latitudes. Given the interactions with clouds, our analysis suggests that not only do the total emissions matter but that their spatial and seasonal distributions are also important and can be an important source of uncertainty in historical climate simulations.

390

In the 21<sup>st</sup> century projections, the lower greenhouse gases and higher aerosol emissions of the CMIP6 SSP3-7.0 relative to the CMIP5 RCP8.5 is evident, and decreases warming for all latitudes. Note that there are specifics of the individual SSP scenarios and in particular, the SSP3-7.0 assessed here is a high aerosol emission scenario, and so the results presented here are not broadly representative of an RCP versus SSP difference but are instead specific to these individual scenarios. The new simulations presented here enable us to quantify the role of model structure in 21<sup>st</sup> century change simulated by CESM2-LE and CESM1-LE despite the very different scenario forcing that was used. This influence of model structure is generally consistent for changing climate conditions across the 20<sup>th</sup> and 21<sup>st</sup> centuries and in the 21<sup>st</sup> century, model structural differences

400



are responsible for a different meridional pattern of warming. In particular, the CESM2 model structure causes more tropical warming but less Arctic warming relative to CESM1. Feedback analysis reveals that in the tropics this is largely associated with the influence of clouds on shortwave radiation whereas in the Arctic the surface albedo feedback plays an important role. This is consistent with differences in shortwave cloud feedbacks between the model versions as identified in previous work  
405 (e.g. Gettelman et al. 2019; Bacmeister et al 2020; Schneider et al. 2022). As a result of the different meridional structure of warming, by 2100, the Arctic Amplification in CESM2-LE is considerably smaller than in CESM1-LE.

Our study illustrates that forcing uncertainty plays an important role in simulations of both historical and future conditions. Notably, for many of the climate properties assessed here, the historical forcing uncertainty is comparable to the structural  
410 uncertainty associated with different model generations within the same model family. Fyfe et al. (2021) document a similar finding for results from the Canadian Earth System Model (CanESM). There are fundamental differences across all components of CESM2 relative to CESM1 making them considerably different models. The availability of simulations that enable a robust comparison across different climate model generations, such as the CESM2-CMIP5 simulations presented here, is valuable for disentangling the sources of uncertainty in historical and future simulations. A better quantification of  
415 historical forcing uncertainty provides useful context for model assessments that rely on comparisons to the observational record. Future intercomparison projects should seek to better quantify the role of historical forcing uncertainty on simulated climate, for example through dedicated experiments with forcing used in earlier CMIP phases. Exploring forcing uncertainty within multiple models and for multiple forcing sets is important given that the simulated response to various forcings is dependent on model structure and can be non-linear due to a state dependence of climate feedbacks. Note that the availability  
420 of similar simulations for the CanESM (Fyfe et al., 2021) currently allows for a multi-model investigation of some of the high-level findings shown here, such as whether the compensation of model structure and forcing uncertainty is a general characteristic of climate simulations or is instead specific to the CESM family of models. Additionally, given the many differences in climate variability and change simulated by CESM2-LE and CESM1-LE, the publicly available CESM2-CMIP5 simulations will enable future work diagnosing the role of model structure and external forcing on these simulated properties.

425

**Code availability.** The model code needed to run the CESM2-CMIP5 simulations and information on case setups are available from <https://doi.org/10.5281/zenodo.8169925> (Hannay and Holland, 2023).

**Data availability.** Data from the CESM1-LE are available through the NCAR Climate Data Gateway and instructions for data  
430 access are available from <https://www.cesm.ucar.edu/projects/community-projects/LENS/data-sets.html>. Data from the CESM2-LE are also available from NCAR's Climate Data Gateway with instructions for access at <https://www.cesm.ucar.edu/projects/community-projects/LENS2/data-sets.html>. The CESM2-CMIP5 simulations presented here are available from the Climate Data Gateway at <https://doi.org/10.26024/4zgv-rt74> (<https://www.earthsystemgrid.org/dataset/ucar.cgd.cesm2.cmip5.forcing.html>). The post-processed data files used for this



435 manuscript including global mean and zonal mean timeseries of various quantities and feedback analyses are available as a  
child dataset on the Climate Data Gateway (<https://doi.org/10.26024/4zgv-rt74>).

### Supplement link

440 **Author contributions.** M.M. Holland and C. Hannay designed the experiments. C. Hannay and D. Bailey performed the runs.  
W. Wieder, P. Lawrence, and E. Kluzek aided in simulation set up. J. Fasullo, I.R. Simpson, A. Jahn, and J.E. Kay provided  
analysis in support of the study. M.M. Holland wrote the manuscript with input from all authors.

445 **Competing Interests.** The authors declare that they have no conflict of interest.

**Acknowledgements.** The CESM project is supported primary by the National Science Foundation. This material is based on  
work supported by the National Center for Atmospheric Research, which is a major facility sponsored by the National Science  
Foundation under the Cooperative Agreement 1852977. Computing and data storage resources, including the Cheyenne  
450 supercomputer (<https://doi.org/10.5065/D6RX99HX>), were provided by the Computational and Information Systems  
Laboratory at NCAR. We thank all the scientists, software engineers, and administrators who contributed to the development  
and availability of CESM. We thank Dr. Simone Tilmes and Dr. Louisa Emmons for their help with emissions forcing datasets.  
The efforts of Dr. Fasullo in this work were supported by NASA Awards 80NSSC17K0565 and 80NSSC22K0046, and by the  
Regional and Global Model Analysis (RGMA) component of the Earth and Environmental System Modeling Program of the  
455 U.S. Department of Energy's Office of Biological & Environmental Research (BER) via National Science Foundation IA  
1947282. Dr. Jahn acknowledges support from NSF CAREER award OPP – 1847398.

### References

Bacmeister, J.T., Hannay, C., Medeiros, B., Gettelman, A., Neale, R., Fredriksen, H. B., et al.: CO2 increase experiments using  
460 the CESM: Relationship to climate sensitivity and comparison of CESM1 to CESM2. *Journal of Advances in Modeling Earth  
Systems*, 12, e2020MS002120. <https://doi.org/10.1029/2020MS002120>, 2020.

Danabasoglu, G., Lamarque, J.-F., Bacmeister, J., Bailey, D. A., DuVivier, A. K., Edwards, J., et al.: The Community Earth  
System Model Version 2 (CESM2). *Journal of Advances in Modeling Earth Systems*, 12, e2019MS001916.  
465 <https://doi.org/10.1029/2019MS001916>, 2020.



- DeRepentigny, P., Jahn, A., Holland, M.M., and Smith, A.: Arctic sea ice in two configurations of the CESM2 during the 20<sup>th</sup> and 21<sup>st</sup> centuries. *J. Geophys. Res. Oceans*, <https://doi.org/10.1029/2020JC016133>, 2020.
- 470
- DeRepentigny, P., Jahn, A., Holland, M.M., Kay, J.E., Fasullo, J.T., Lamarque, J.-F., Hannay, C., Mills, M.J., Bailey, D.A., Tilmes, S. and Barrett, A.: Enhanced simulated early 21st century Arctic sea ice loss due to CMIP6 biomass burning emissions, *Science Advances*, 8(30), eabo2405, <https://doi.org/10.1126/sciadv.abo2405>, 2022.
- 475 Deser, C., Lehner, F., Rodgers, K.B. et al.: Insights from Earth system model initial-condition large ensembles and future prospects. *Nat. Clim. Chang.* 10, 277–286. <https://doi.org/10.1038/s41558-020-0731-2>, 2020.
- DuVivier, A. K., Holland, M. M., Kay, J. E., Tilmes, S., Gettelman, A., and Bailey, D.: Arctic and Antarctic sea ice state in the Community Earth System Model Version 2. *Journal of Geophysical Research: Oceans*, 125, e2019JC015934. <https://doi.org/10.1029/2019JC015934>, 2020.
- 480
- England, M.R., Eisenman, I., Lutsko, N.J., and Wagner, T.J.W.: The recent emergence of Arctic amplification, *Geophys. Res. Lett.*, 48, e2021GL094086. <https://doi.org/10.1029/2021GL094086>, 2021.
- 485 Eyring, V., Bony, S., Meehl, G. A., Senior, C. A., Stevens, B., Stouffer, R. J., and Taylor, K. E.: Overview of the Coupled Model Intercomparison Project Phase 6 (CMIP6) experimental design and organization, *Geosci. Model Dev.*, 9, 1937–1958. <https://doi.org/10.5194/gmd-9-1937-2016>, 2016..
- 490 Fasullo, J. T., Lamarque, J.-F., Hannay, C., Rosenbloom, N., Tilmes, S., DeRepentigny, P., Jahn, A., and Deser, C.: Spurious late historical-era warming in CESM2 driven by prescribed biomass burning emissions. *Geophys. Res. Lett.*, 49, e2021GL097420. <https://doi.org/10.1029/2021GL097420>, 2022.
- Fyfe, J. C., Kharin, V.V., Santer, B.D., Cole, J.N.S., and Gillett, N.P.: Significant impact of forcing uncertainty in a large ensemble of climate model simulations. *Proc. Natl. Acad. Sci. (USA)*, 118, e2016549 118, 2021.
- 495
- Gettelman, A., and Morrison, H.: Advanced two-moment bulk microphysics for global models. Part 2: Off-line tests and comparison with other schemes. *J. Clim.*, 28, 1268–1287, 2015.



500 Gettelman, A., Hannay, C., Bacmeister, J.T., Neale, R.B., Pendergrass, A.G., Danabasoglu, G., et al.: High climate sensitivity  
in the Community Earth System Model Version 2 (CESM2). *Geophysical Research Letters*, 46, 8329–8337.  
<https://doi.org/10.1029/2019GL083978>, 2019.

505 Gettelman, A., and Coauthors : The Whole Atmosphere Community Climate Model Version6 (WACCM6). *J. Geophys. Res.:  
Atm*, 124, <https://doi.org/10.1029/2019JD030943>, 2019b.

Gidden, M. J., and Coauthors: Global emissions pathways under different socioeconomic scenarios for use in CMIP6: a dataset  
of harmonized emissions trajectories through the end of the century. *Geosci. Model Dev.*, 12, 1443–1475, 2019.

510 Golaz, J.-C., Larson, V.E., and Cotton, W.R.: A PDF-based model for boundary layer clouds. Part I: Method and model  
description. *Journal of the Atmospheric Sciences*, 59, 3540–3551, 2002.

Hannay, C., and Holland, M: NCAR/CESM2-CMIP5: CESM2-CMIP5 experiments (v1.1) (CESM2-CMIP1-v1.1).  
Zenodo. <https://doi.org/10.5281/zenodo.8169925>, 2023.

515 Hawkins, E., and Sutton, R.: The potential to narrow uncertainty in regional climate predictions. *Bulletin of the American  
Meteorological Society*, 90(8), 1095–1108, 2009.

520 Heyblom, K.B., Singh, H.A., Rasch, P.J., and DeRepentigny, P.: Increased variability of biomass burning emissions in CMIP6  
amplifies hydrologic cycle in the CESM2 large ensemble. *Geophys. Res. Lett.*, 49 (5), <https://doi.org/10.1029/2021GL096868>,  
2022.

Holland, M.M., and Landrum, L.: The emergence and transient nature of Arctic amplification in coupled climate  
models. *Frontiers*, <https://doi.org/10.3389/feart.2021.719024>, 2021.

525 Hunke, E.C., Hebert, D.A., and Lecomte, O.: Level-ice melt ponds in the Los Alamos sea ice model, CICE. *Ocean Modelling*,  
71, 26–42, 2013.

Hurrell, J. W., and Coauthors: The Community Earth System Model: A Framework for Collaborative Research. *Bull. Amer.  
Meteor. Soc.*, 94, 1339–1360, 2013.

530

Kay, J. E., and Coauthors: The Community Earth System Model (CESM) Large Ensemble Project. *Bull. Amer. Meteor. Soc.*,  
96, 1333–1349, 2015.





- Lamarque, J.-F., Bond, T. C., Eyring, V., Granier, C., Heil, A., Klimont, Z., Lee, D., Liousse, C., Mieville, A., Owen, B.,  
535 Schultz, M. G., Shindell, D., Smith, S. J., Stehfest, E., Van Aardenne, J., Cooper, O. R., Kainuma, M., Mahowald, N.,  
McConnell, J. R., Naik, V., Riahi, K., and van Vuuren, D. P.: Historical (1850–2000) gridded anthropogenic and biomass  
burning emissions of reactive gases and aerosols: methodology and application, *Atmos. Chem. Phys.*, 10, 7017–7039,  
<https://doi.org/10.5194/acp-10-7017-2010>, 2010.
- 540 Larson, V.E.: CLUBB-SILHS: A parameterization of subgrid variability in the atmosphere. arXiv:1711.03675v2 [physics.aos-  
ph], 2017.
- Lawrence, D., and Coauthors: The Community Land Model, version 5: Description of new features, benchmarking and impact  
of forcing uncertainty. *J. Adv. Mod. Earth Sys.*, 11, 4245–4287, 2019.
- 545 Li, Q., Webb, A., Fox-Kemper, B., Craig, A., Danabasoglu, G., Large, W.G. and Vertenstein, M.: Langmuir mixing effects on  
global climate: WAVEWATCH III in CESM. *Ocean Modelling*, 103, 145-160, 2016.
- Liu, X., Ma, P.-L., Wang, H., Tilmes, S., Singh, B., Easter, R.C., Ghan, S.J., and Rasch, P.J.: Description and evaluation of a  
550 new four-mode version of the Model Aerosol Module (MAM4) within version 5.3 of the Community Atmosphere Model.  
*Geosci. Model Dev.*, 9, 505–522, 2016.
- Marsh, D.R., Mills, M.J., Kinnison, D.E., Lamarque, J.-F., Calvo, N., and Polvani, L.M.: Climate change from 1850 to 2005  
simulated in CESM1(WACCM). *Journal of Climate*, 26(19), 7372-7391. <https://doi.org/10.1175/JCLI-D-12-00558.1>, 2013.  
555
- Meinshausen, M., and Coauthors: The RCP greenhouse gas concentrations and their extensions from 1765 to 2300. *Climatic  
Change*, 109, 213–241, 2011.
- Meinshausen, M., and Coauthors: The shared socio-economic pathway (SSP) greenhouse gas concentrations and their  
560 extensions to 2500. *Geosci. Model Dev.*, 13, 3571–3605, 2020.
- Rodgers, K. B., and Coauthors: Ubiquity of human-induced changes in climate variability. *Earth Sys. Dynam.*, 12, 1393–1411,  
2021.
- 565 Schneider, D.P., Kay, J.E., and Hannay, C.: Cloud and surface albedo feedbacks reshape 21<sup>st</sup> century warming in successive  
generations of an earth system model. *Geophysical Research Letters*, 49(19), <https://doi.org/10.1029/2022GL100653>, 2022.



- 570 Sun, Q., Whitnew, M.M., Bryan, F.O., and Tseng, Y.-H.: Assessing the skill of the improved treatment of riverine freshwater in the Community Earth System Model (CESM) relative to a new salinity climatology. *Journal of Advances in Modeling Earth Systems*, 11(5), 1189-1206. <https://doi.org/10.1029/2018MS001349>, 2019.
- 575 Taylor, K.E., Crucifix, M., Praconnot, P., Hewitt, C.D., Doutriaux, C., Broccoli, A.J., Mitchell, J.F.B., and Webb, M.J.: Estimating shortwave radiative forcing and response in climate models. *Journal of Climate*, 20, 2530-2543. <https://doi.org/10.1175/JCLI4143.1>, 2007.
- Trenberth, K.E., and Fasullo, J.T.: Global warming due to increasing absorbed solar radiation. *Geophys. Res. Lett.* 36(7). <https://doi.org/10.1029/2009GL037527>, 2009.
- 580 Turner, A.K., and Hunke, E.C.: Impacts of a mushy-layer thermodynamic approach in global sea-ice simulations using the CICE sea ice model. *Journal of Geophysical Research: Oceans*, 120, 1253-1275. <https://doi.org/10.1002/2014JC010358>, 2015.
- 585 Van Marle, M. J., Kloster, S., Magi, B. I., Marlon, J. R., Daniau, A. L., Field, R. D., ... & Van Der Werf, G. R.: Historic global biomass burning emissions for CMIP6 (BB4CMIP) based on merging satellite observations with proxies and fire models (1750–2015). *Geoscientific Model Development*, 10(9), 3329-3357, 2017.
- van Vuuren, D.P., Edmonds, J., Kainuma, M. *et al.*: The representative concentration pathways: an overview. *Climatic Change* 109, 5. <https://doi.org/10.1007/s10584-011-0148-z>, 2011.
- 590 Singh, H.K.A, Goldenson, N., Fyfe, J.C., and Polvani, L.M.: Uncertainty in preindustrial global ocean initialization can yield irreducible uncertainty in southern ocean surface climate. *J. Climate*, 36, doi:10.1175/JCLI-D-21-0176.1, 2023.
- Wang, Z., Lin, L., Xu, Y. *et al.*: Incorrect Asian aerosols affecting the attribution and projection of regional climate change in CMIP6 models. *npj Clim Atmos Sci* 4, 2. <https://doi.org/10.1038/s41612-020-00159-2>, 2021.
- 595 Webster M. A., DuVivier A. K., Holland M. M., and Bailey D. A.: Snow on Arctic sea ice in a warming climate as simulated in CESM2. *Journal of Advances in Modeling Earth Systems*, doi:10.1029/2020JC016308, 2020.



Figures.

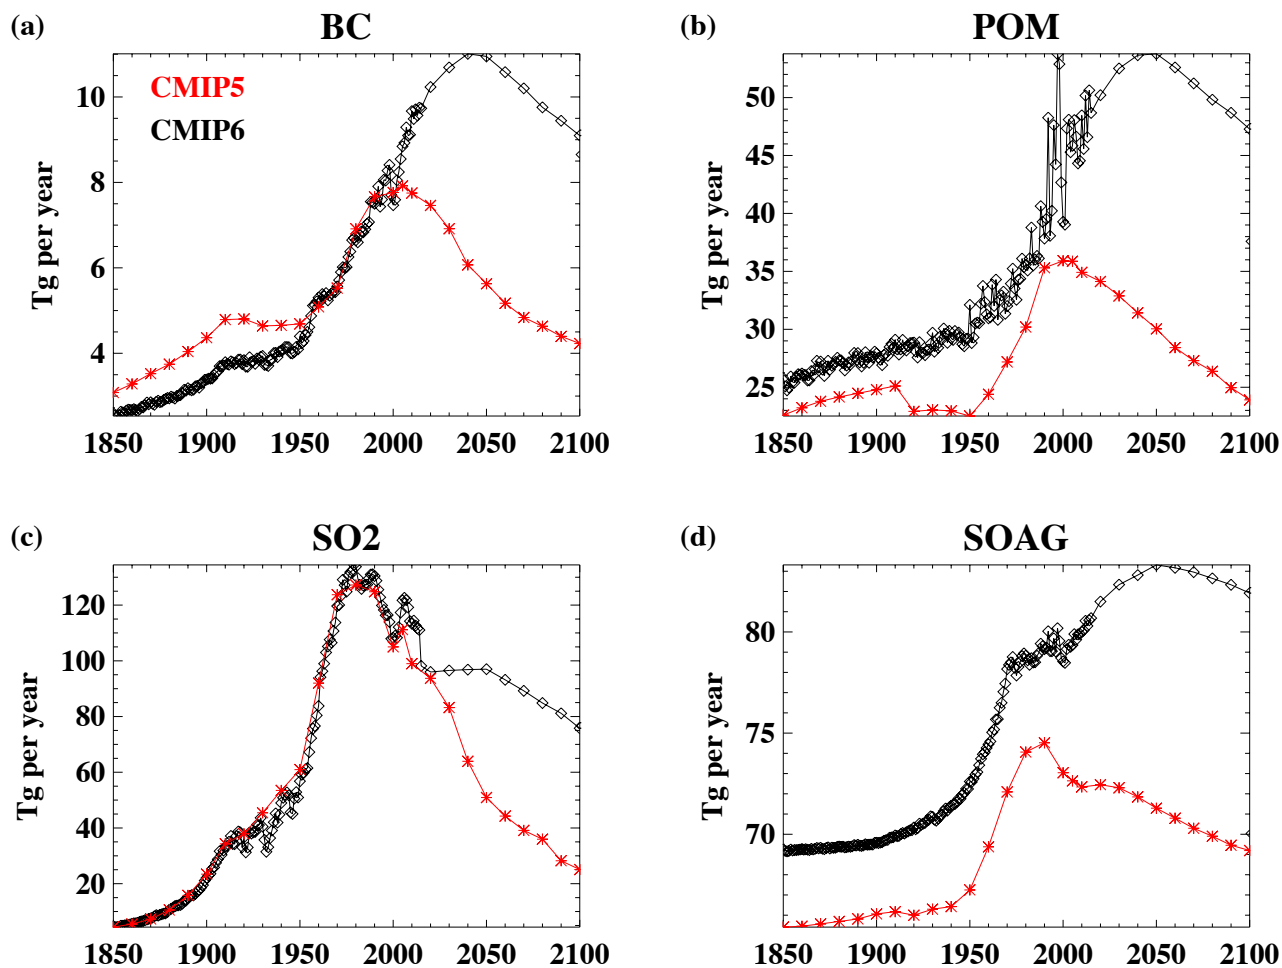

600

Figure 1: Emissions of global anthropogenic and biomass burning emissions including (a) black carbon (BC), (b) primary organic matter (POM), (c) sulfur dioxide, and (d) gas-phase condensable sources of secondary organic aerosols (SOAG) for CMIP5 (red) and CMIP6 (black) forcings.

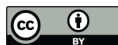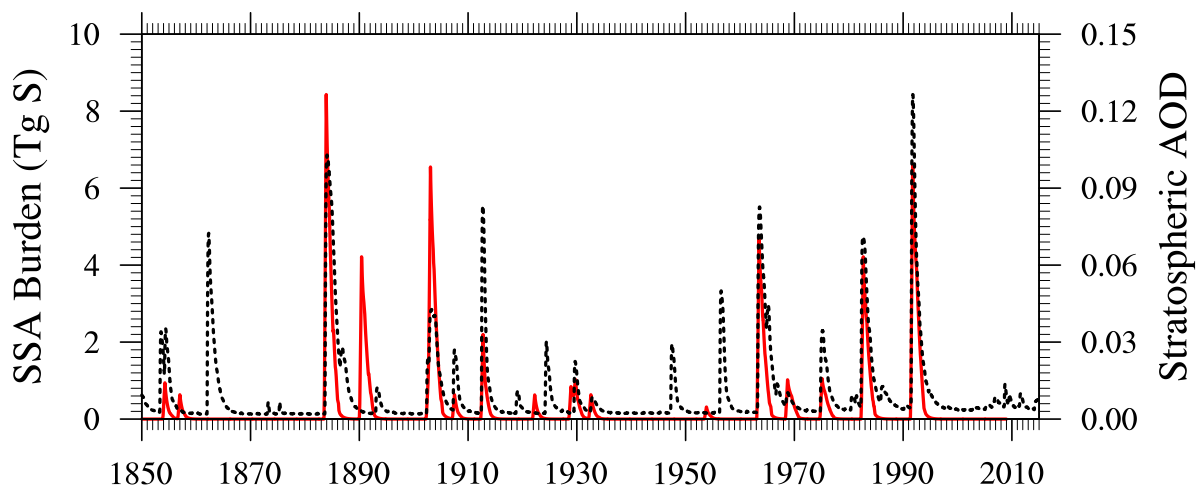

605 Figure 2. Proxy measures of the volcanic forcing in CESM1-LE and CESM2-LE simulations, including the stratospheric sulfate aerosol (SSA) burden in CESM1-LE (red; left axis) and the stratospheric aerosol optical depth (AOD) from CESM2-LE (black dashed; right axis).

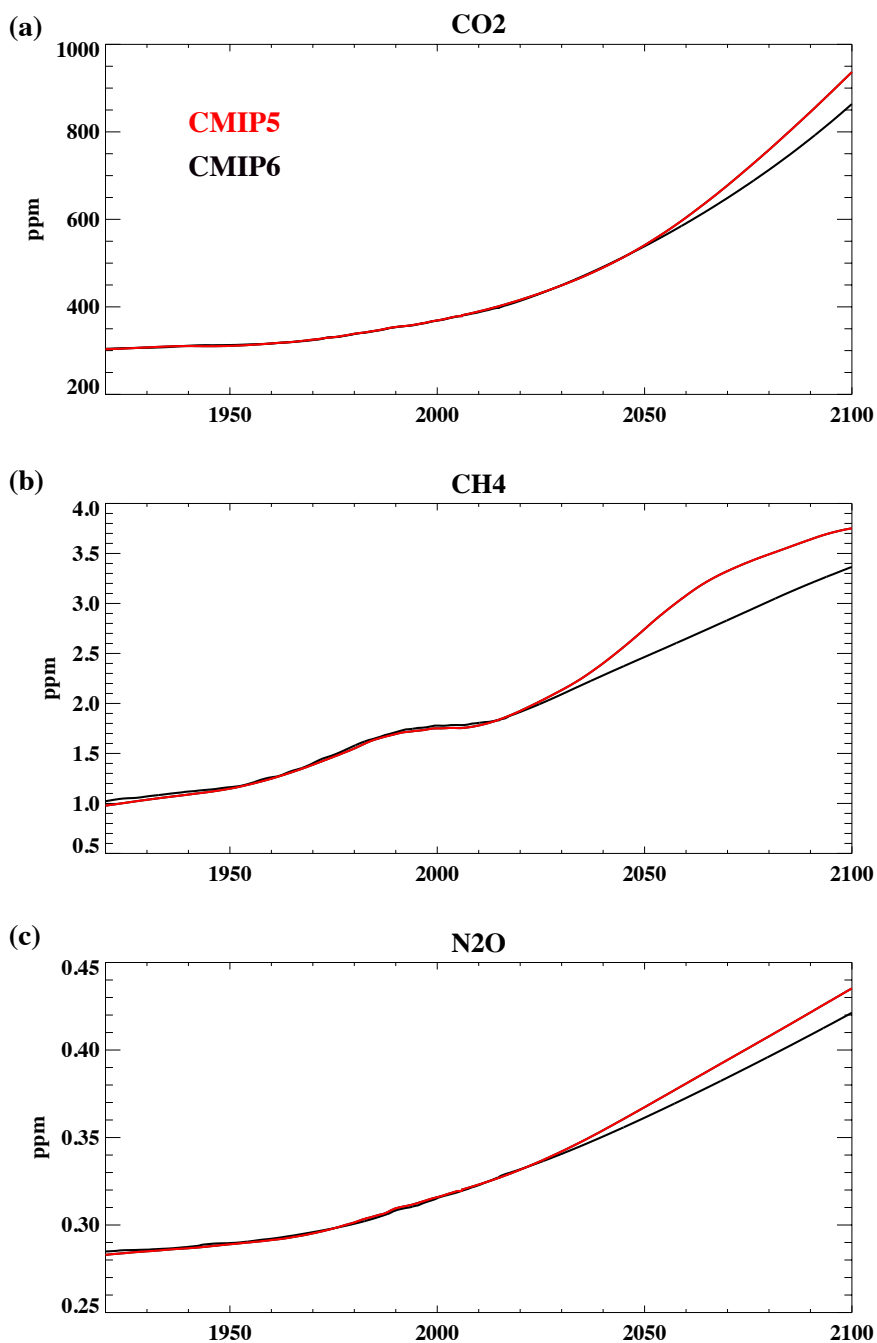

610 Figure 3. Prescribed concentrations of greenhouse gases including (a) CO<sub>2</sub>, (b) CH<sub>4</sub>, and (c) N<sub>2</sub>O for CMIP5 (red) and CMIP6 (black) forcings.

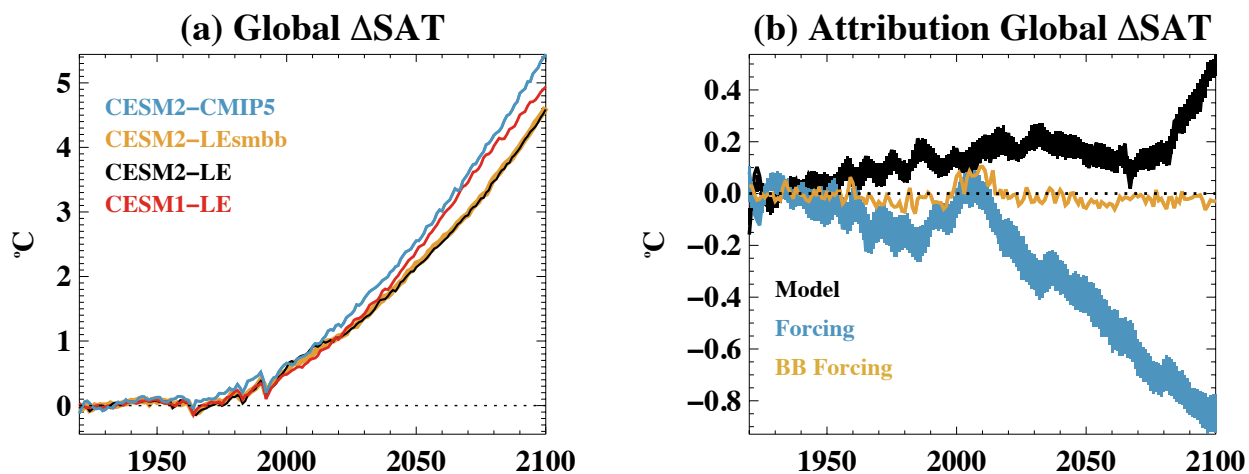

615 Figure 4. The 1920-2100 timeseries of (a) the change in global ensemble mean surface air temperature since 1920-1950, and (b) the attribution of CESM2-LE versus CESM1-LE differences in air temperature change to structural model differences and forcing differences as defined in the methods section.

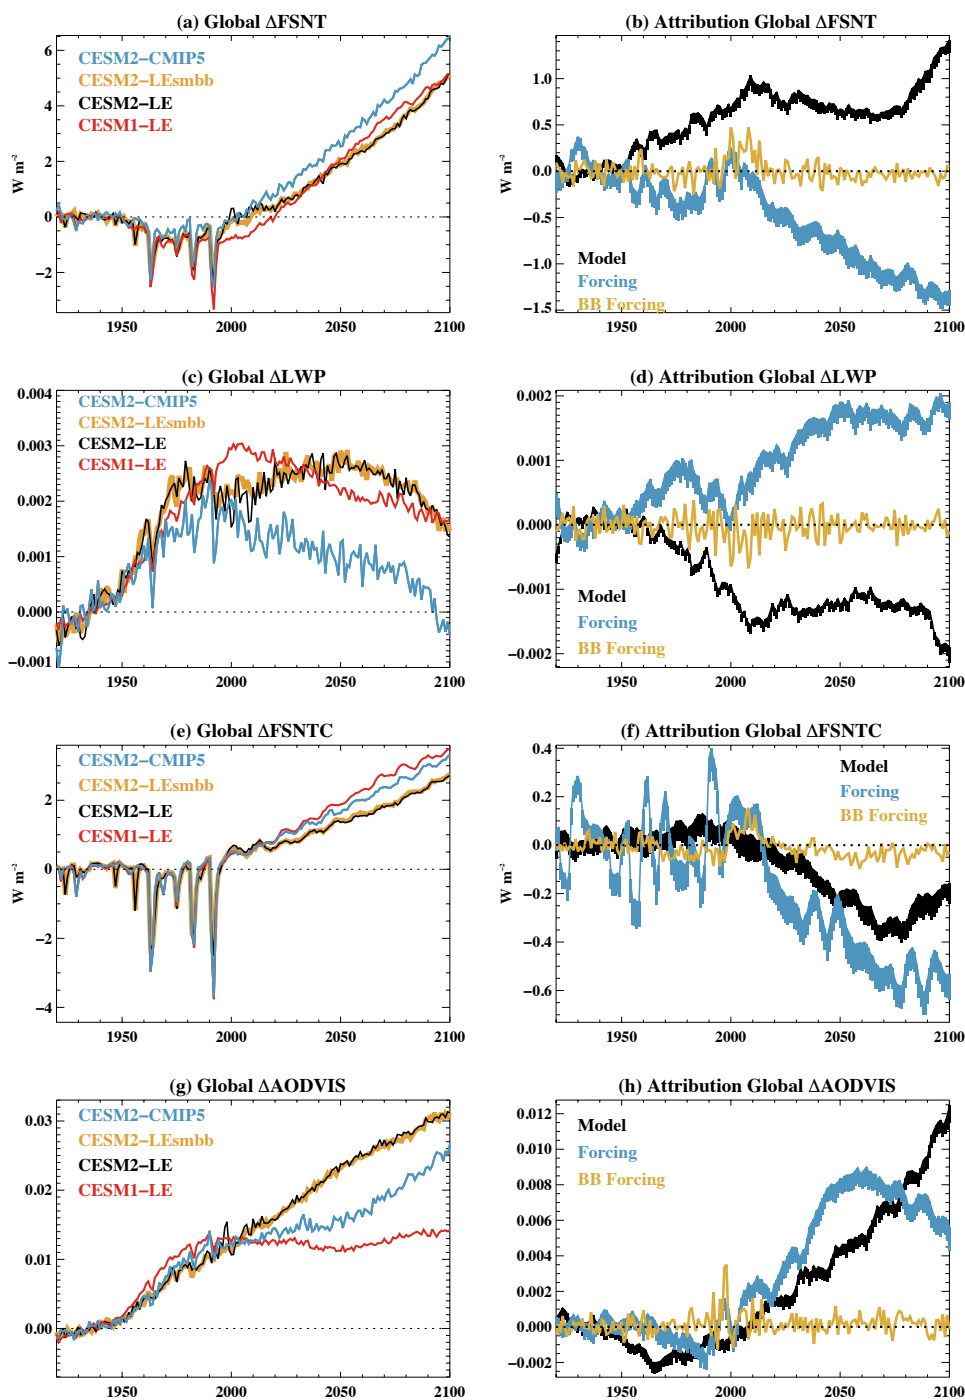

620 **Figure 5.** (a) Change in global ensemble mean net TOA SW (b) Attribution of differences in CESM2-LE versus CESM1-LE simulated net TOA SW change to model and forcing uncertainty, (c) As in 5a but for global cloud liquid water path, (d) As in 5b but for global cloud liquid water path, (e) As in 5a but for net TOA clear-sky SW, (f) As in 5b but for net TOA clear-sky SW, (g) As in 5a but for global aerosol optical depth, (h) As in 5b but for global aerosol optical depth.

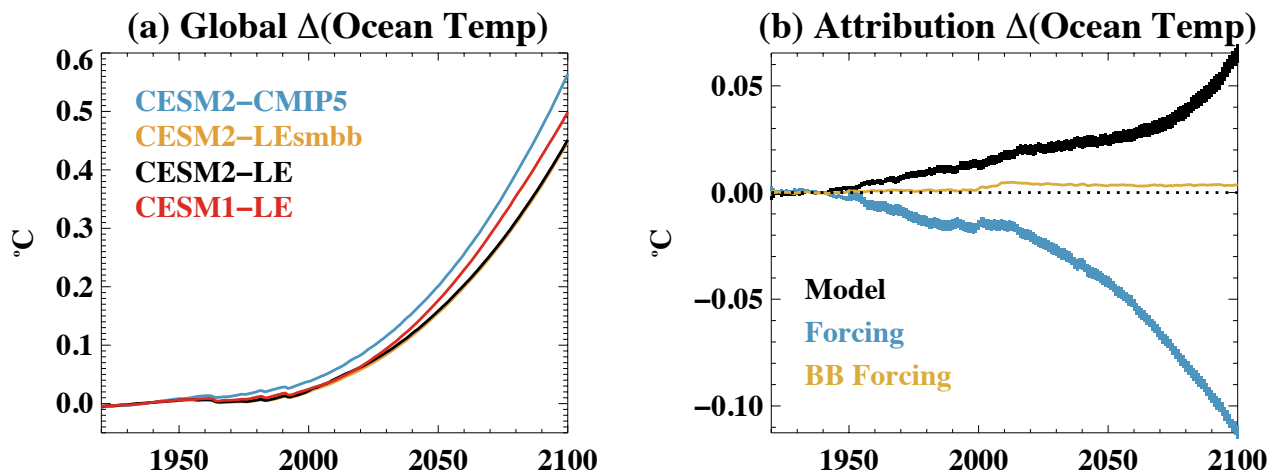

625 Figure 6. (a) Change in global ensemble mean depth-integrated ocean temperature and (b) Attribution of differences in CESM2-LE versus CESM1-LE simulated ocean temperature change to model and forcing uncertainty.



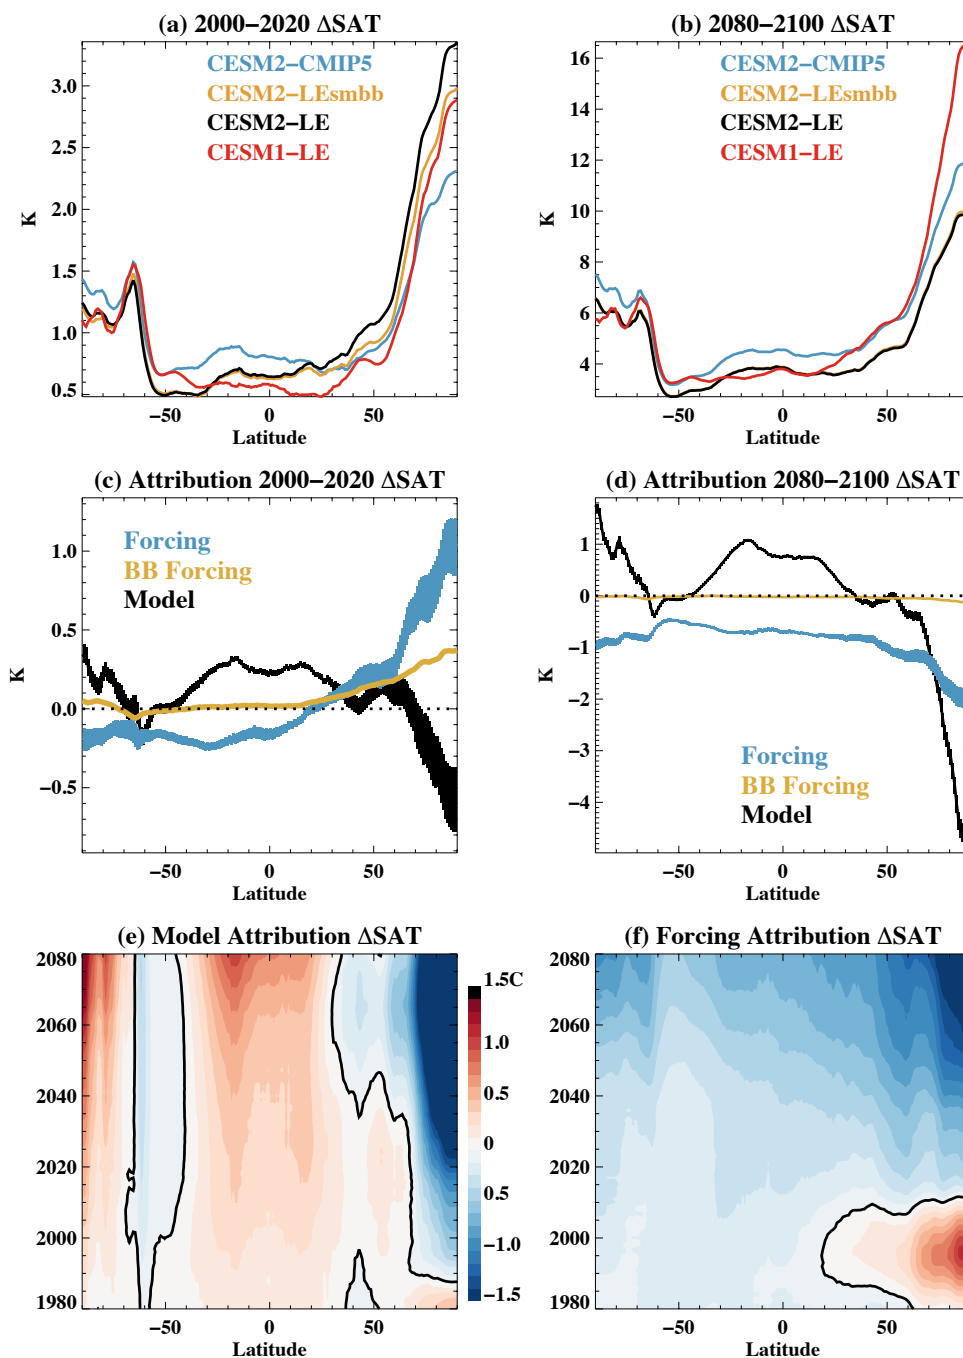

**Figure 7. Zonally averaged surface air temperature change.** (a) 2000–2020 ensemble mean change. (b) 2080–2100 ensemble mean change. (c) Attribution of CESM2-LE versus CESM1-LE differences in the 2000–2020 change to model and forcing uncertainty. (d) Attribution of differences in the 2080–2100 change to model and forcing uncertainty. (e) Attribution of differences in the running 10-year average ensemble mean change to model uncertainty. (f) Attribution of differences in the running 10-year average ensemble mean change to forcing uncertainty. For panels (e) and (f), the same color bar is used.

630

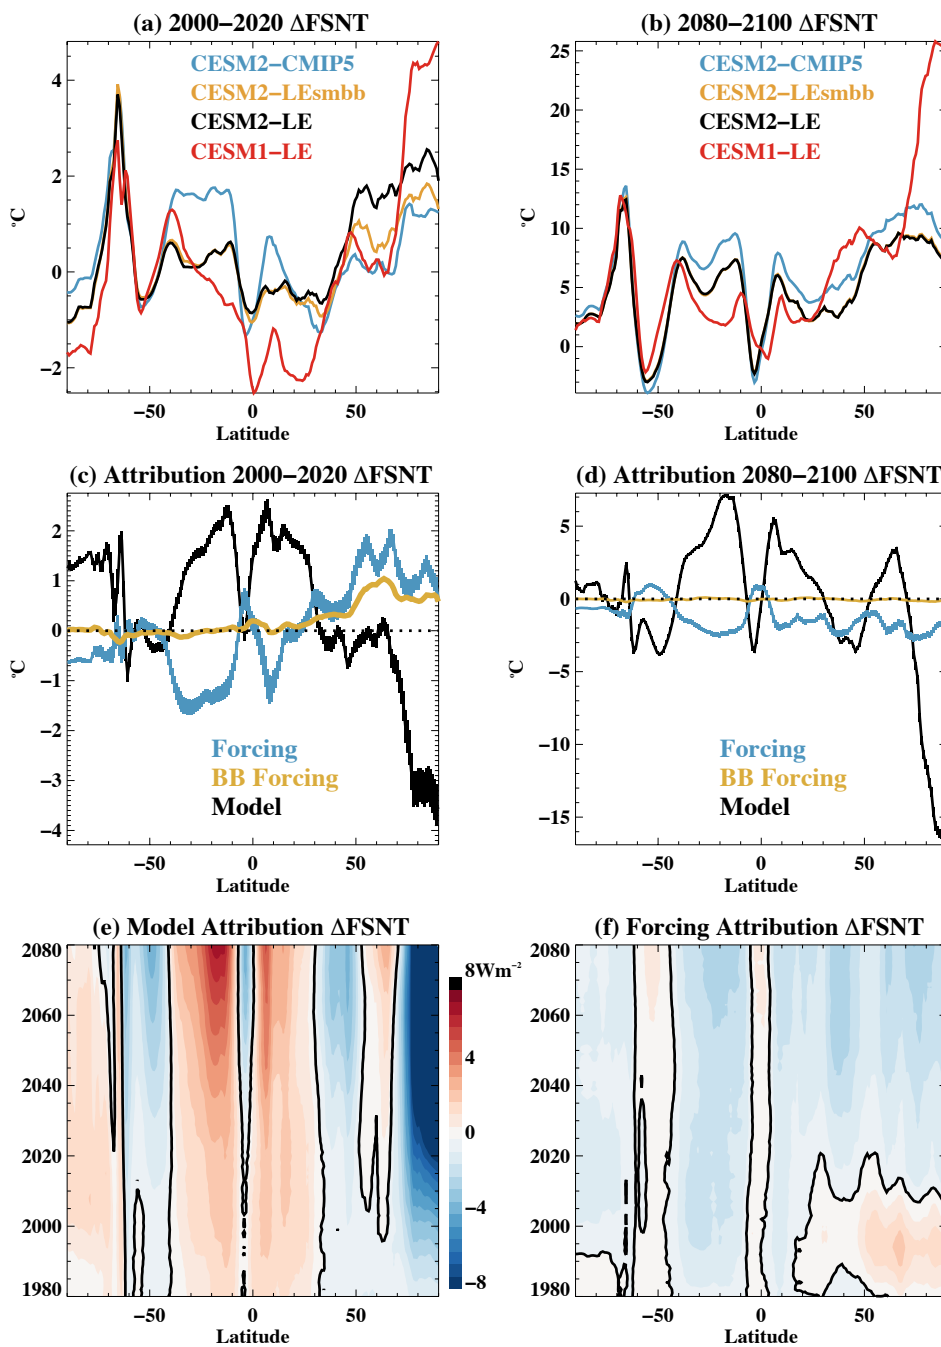

635 Figure 8. Same as Figure 7 but for change in the zonally-averaged net TOA SW.

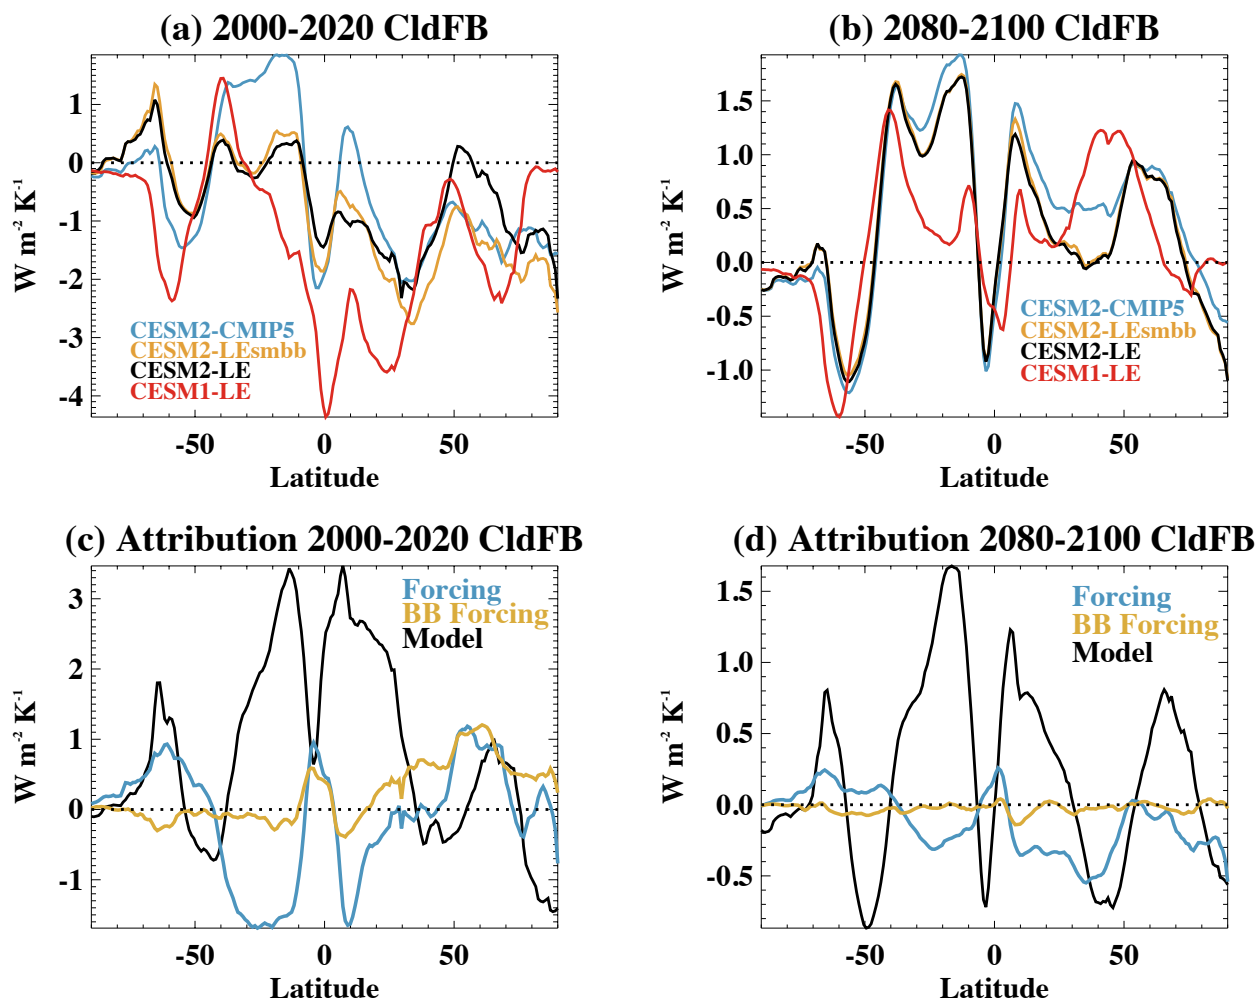

Figure 9. The zonal mean SW cloud feedback estimated from the APRP method for (a) the 2000-2020 average, (b) the 2080-2100 average, and the attribution of differences in the SW cloud feedback in CESM2-LE versus CESM1-LE to model and forcing uncertainty for the (c) 2000-2020 average feedback and (d) the 2080-2100 average feedback.

640

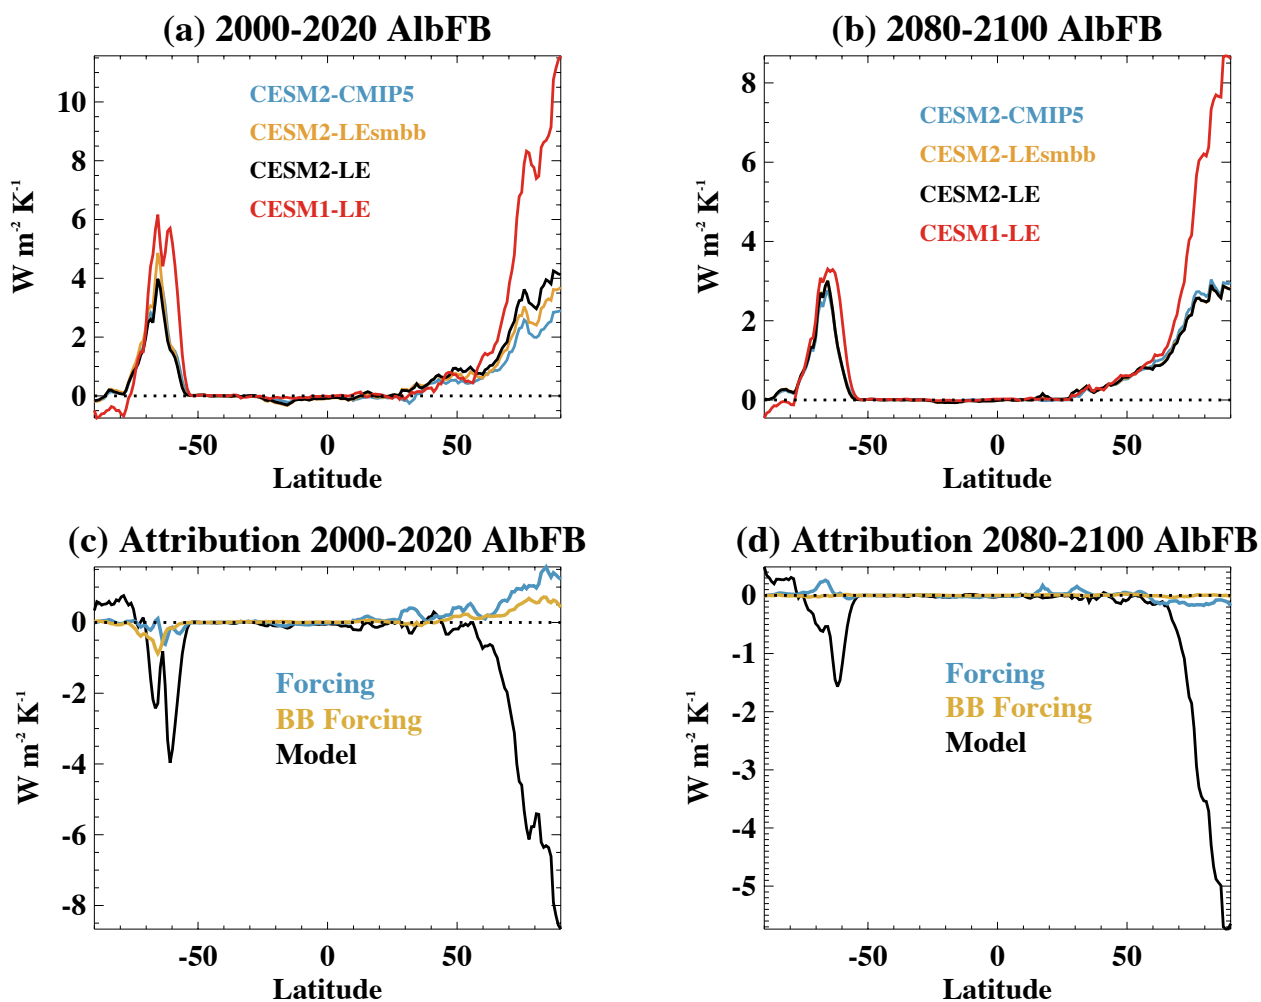

645 Figure 10. The zonal mean surface albedo feedback estimated from the APRP method for (a) the 2000-2020 average and (b) the 2080-2100 average and the attribution of differences in the surface albedo feedback in CESM2-LE versus CESM1-LE to model and forcing uncertainty for the (c) 2000-2020 average feedback and (d) the 2080-2100 average feedback.

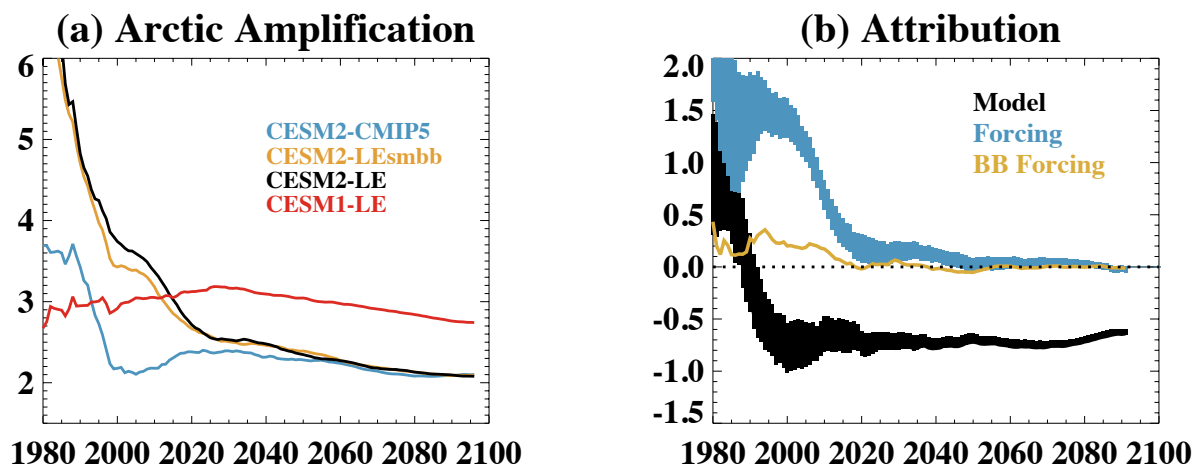

Figure 11. The (a) simulated ensemble mean Arctic amplification (AA) factor and (b) attribution of differences in the AA factor in CESM2-LE versus CESM1-LE to model structure and forcing differences.

650

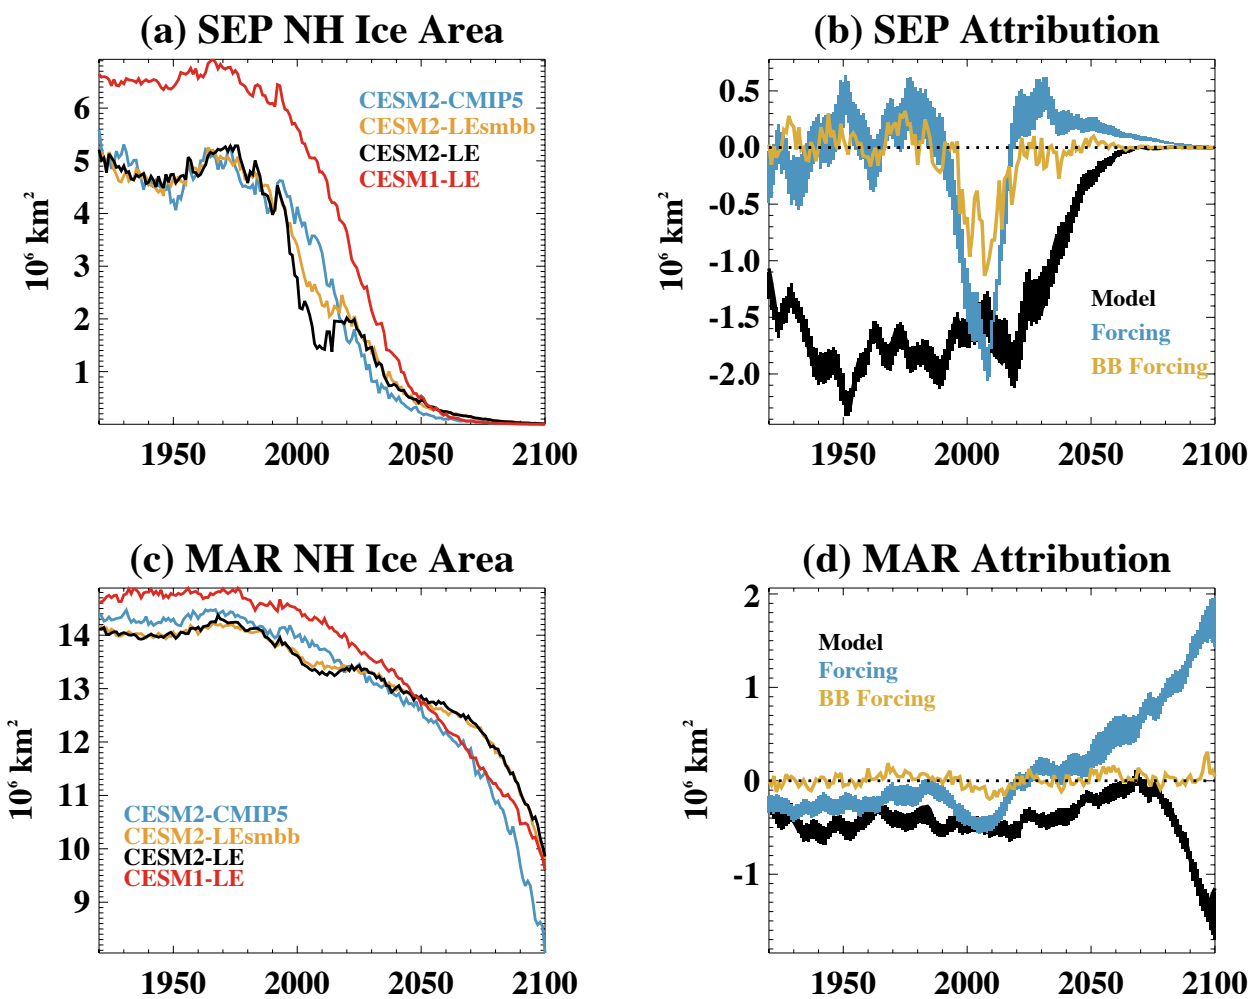

Figure 12. The timeseries of northern hemisphere (a) September sea ice area, (b) attribution of CESM2-LE versus CESM1-LE September ice area differences to model and forcing uncertainty, (c) March sea ice area, and (d) attribution of CESM2-LE versus CESM1-LE March ice area differences to model and forcing uncertainty.
